# Supplementary material for: Role of salicylic acid in regulating ethylene and physiological characteristics for alleviating salinity stress on germination, growth and yield of sweet pepper
Source: PeerJ. 2020 Mar 27;8:e8475. doi: 10.7717/peerj.8475 (PMC7104718; doi:10.7717/peerj.8475)
Supplement: Data S1 [file peerj-08-8475-s001.xlsx]

## Sheet: Graphs Lab trials
Figure -1	Germination Percentage (%)	Rate of SA	120	144	168	192	216
		0 mM SA	8.33333	16.6667	25	30	40
		0.05 mM SA	9	19	26	33	42
		0.1 mM SA	10	20	27	34	44
		0.2 mM SA	16.6667	25	41.6667	50	66.6667
		0.3 mM SA	8.33333	25	33.3333	33.3333	41.6667
		0.4 mM SA	8.33333	16.6667	16.6667	25	33.3333
		0.5 mM SA	8.33333	25	25	25	33.3333
		0.6 mM SA	0	8.33333	8.33333	16.6667	25
		SE
		Rate of SA	120 h	144 h	168h	192h	216h
		0 m	1.5	0.601407	0.520833	1	0.520833
		0.05 m	1.2	1.25	1.04167	1.25	1.2
		0.1 m	1.12	1.20281	1.6	1.7	1.2
		0.2 m	1.20281	1.04167	1.04167	1.20281	1.4
		0.3 m	2	1.5	1.7	1.9	1.8
		0.4 m	1.1	1.20281	1.8	1.04167	2.1
		0.5 m	1.3	1.6	1.18	1.2	1.8
		0.6 m	1.5	1.11	1.09	1.20281	1.3
	Rate of SA	Ethylene evolved	SA contents
Figure 2	0 m	0.11	2.8
	0.05 m	0.143	2.78
	0.1 m	0.1573	2.7522
	0.2 m	0.1837	2.72468
	0.3 m	0.1859	2.69743
	0.4 m	0.2112	2.67046
	0.5 m	0.2178	2.64375
	0.6 m	0.26136	2.51156
	0 m	0.1	2.7692
	0.05 m	0.13	2.75151
	0.1 m	0.143	2.74151
	0.2 m	0.19837	2.71409
	0.3 m	0.21859	2.68695
	0.4 m	0.222112	2.66008
	0.5 m	0.27	2.63348
	0.6 m	0.2835	2.50181
	0 m	0.11245	2.80708
	0.05 m	0.128	2.79006
	0.1 m	0.1583	2.77901
	0.2 m	0.189837	2.75122
	0.3 m	0.219886	2.7237
	0.4 m	0.235311	2.69647
	0.5 m	0.23678	2.6695
	0.6 m	0.250863	2.65023
Figure 3	Rate of SA	SA contents (528 hr)	Electrolyte leakage
	0 m	0.110506	40.3604
	0.05 m	0.134	39.9063
	0.1 m	0.158024	38.721
	0.2 m	0.185455	35.1887
	0.3 m	0.186755	25.9393
	0.4 m	0.201298	22.4015
	0.5 m	0.212172	21.3219
	0.6 m	0.228802	22.8155
	0 m	0.121051	43.3604
	0.05 m	0.1354	35.9063
	0.1 m	0.156802	38.721
	0.2 m	0.187545	33.1887
	0.3 m	0.184676	26.9393
	0.4 m	0.221298	22.4015
	0.5 m	0.201217	19.3219
	0.6 m	0.22188	15.8155
	0 m	0.122105	40.3604
	0.05 m	0.14354	32.9063
	0.1 m	0.16568	35.721
	0.2 m	0.168755	34.1887
	0.3 m	0.178468	29.9393
	0.4 m	0.212977	25.4015
	0.5 m	0.211217	20.3219
	0.6 m	0.23188	13.8155
		Ethylene evolution	Electrolyte leakage
		3.197	40.3604
		3.1195	39.9063
		2.9155	38.721
		2.72684	35.1887
		2.71864	25.9393
		2.62967	22.4015
		2.46277	21.3219
		2.181	22.8155
		3.1797	43.3604
		3.1295	35.9063
		2.92155	38.721
		2.74268	33.1887
		2.72186	26.9393
		2.63297	22.4015
		2.45628	19.3219
		2.21	15.8155
		3.2	40.3604
		3.105	32.9063
		2.82155	35.721
		2.62684	34.1887
		2.57219	29.9393
		2.5633	25.4015
		2.55628	20.3219
		2.31	13.8155

## Sheet: Data sheet for Statistical anal
Rate of SA	SA	Replication	Branches per plant	leaves per plant	Leaf area	No. of flower per plant	No. of fruits per plant	fruit yield per plant	Photosynthetic rate	Stomata conductance	Transpiration	Photosynthetic WUE	N Recovery Efficiency	N Agronomic use efficiency	P Recovery Efficiency	P Agronomic use efficiency	K Recovery Efficiency	K Agronomic use efficiency
0 mM SA	1	1	7.58	102	24.3648	31.7344	10.528	408	12.78	0.49	3.98	3.21106	31.47	54.98	21.22	99.27	37.21	89.34
0.05 mM SA	2	1	7.92	106	25.4667	33.1696	11.0041	427.098	12.96	0.43	3.57	3.63025	34.16	69.67	22.14	125.79	40.49	113.21
0.1 mM SA	3	1	8.31	111	26.7147	34.7951	11.5434	452.928	13.6545	0.36	3.36	4.06384	39.03	89.54	23.81	161.67	46.44	145.5
0.2 mM SA	4	1	8.51	114	27.3482	35.6202	11.8171	495	14.125	0.25	3.28	4.3064	47.35	121.9	26.66	220.1	56.59	198.09
0.3 mM SA	5	1	9.06	121	29.1122	37.9177	12.5793	469	15.0582	0.34	3.23	4.66199	50.37	101.9	28.73	183.99	63.98	165.59
0.4 mM SA	6	1	8.17	110	26.2584	34.2008	11.3462	443.485	12.6545	0.25	3.12	4.05593	39.87	82.27	25.47	148.55	52.34	133.69
0.5 mM SA	7	1	6.33	85	20.3393	26.4913	8.78859	388	11.0542	0.19	3.05	3.62434	11.18	39.59	12.8	71.49	7.16	64.34
0.6 mM SA	8	1	5.81	78	18.6797	24.3297	8.07147	366.623	10.005	0.2	2.75	3.63818	6.6	23.15	9.52	41.8	-4.53	37.62
	1	2	7.13	96	22.9029	29.8303	9.89632	411	11.8	0.29	4.0198	2.93547	38.31	55.13	22.76	99.53	48.94	89.58
	2	2	7.45	100	23.9387	31.1794	10.3439	415.472	12.92	0.25	3.6057	3.58322	35.8	58.57	22.73	105.74	48.84	95.17
	3	2	7.81	105	25.1118	32.7074	10.8508	452.753	14.025	0.31	3.3936	4.13278	40.72	87.24	24.32	157.52	54.51	141.77
	4	2	8	107	25.7074	33.483	11.1081	492	14.255	0.29	3.3128	4.30301	44.66	117.43	26.14	212.03	61	190.83
	5	2	8.51	114	27.3654	35.6426	11.8246	471	15.4658	0.22	3.2623	4.74076	56.61	101.28	30.76	182.86	77.48	164.58
	6	2	7.68	103	24.6829	32.1488	10.6655	435	12.025	0.26	3.1512	3.81601	43.66	73.59	26.82	132.86	63.44	119.58
	7	2	5.95	80	19.119	24.9018	8.26128	395.715	12.716	0.24	3.0805	4.1279	7.82	43.37	12.33	78.3	11.73	70.47
	8	2	5.46	73	17.5589	22.8699	7.58718	363.426	9.2	0.18	3	3.06667	7.29	18.53	9.15	33.46	0.41	30.11
	1	3	7.73	104	24.8521	32.3691	10.7386	412	10.93	0.35	3.9402	2.77397	30.9	53.65	21.68	96.86	38.38	87.18
	2	3	8.08	108	25.9761	33.833	11.2242	437.64	11.03	0.29	3.5343	3.12084	33.54	73.37	22.59	132.47	41.6	119.23
	3	3	8.48	114	27.249	35.491	11.7743	461.987	13.099	0.2	3.3264	3.93789	40.91	92.1	24.75	166.29	49.32	149.66
	4	3	8.68	116	27.8952	36.3326	12.0535	489	13.326	0.31	3.2472	4.10384	42.27	112.88	25.58	203.81	52.26	183.43
	5	3	9.24	124	29.6944	38.6761	12.8309	470	14.7275	0.19	3.1977	4.60565	45.3	98.26	29.66	177.42	66.83	159.68
	6	3	8.33	112	26.7836	34.8848	11.5732	451.355	13.099	0.19	3.0888	4.24081	26.72	83.92	20.55	151.52	34.33	136.37
	7	3	6.45	87	20.7461	27.0212	8.96436	380.393	12.2102	0.22	3.0195	4.0438	11.89	29.33	13.68	52.96	9.82	47.67
	8	3	5.93	79	19.0533	24.8163	8.2329	374.356	9.54	0.18	2.99	3.19064	8.1	24.69	10.4	44.58	-1.87	40.12
	Mean Values	Treatment	Branches per plant	leaves per plant	Leaf area	No. of flower per plant	No. of fruits per plant	fruit yield per plant	Photosynthetic rate	Stomata conductance	Transpiration	Photosynthetic WUE	N Recovery Efficiency	N Agronomic use efficiency	P Recovery Efficiency	P Agronomic use efficiency	K Recovery Efficiency	K Agronomic use efficiency
		Control	7.48	100.667	24.0399	31.3113	10.3876	410.333	11.8367	0.376667	3.98	2.9735	33.56	54.5867	21.8867	98.5533	41.51	88.7
		NPK	7.81667	104.667	25.1272	32.7274	10.8574	426.737	12.3033	0.323333	3.57	3.44477	34.5	67.2033	22.4867	121.333	43.6433	109.203
		0.05 mM + NPK	8.2	110	26.3585	34.3311	11.3895	455.889	13.5928	0.29	3.36	4.04484	40.22	89.6267	24.2933	161.827	50.09	145.643
		0.1 mM + NPK	8.39667	112.333	26.9836	35.1453	11.6596	492	13.902	0.283333	3.28	4.23775	44.76	117.403	26.1267	211.98	56.6167	190.783
		0.2 mM + NPK	8.93667	119.667	28.724	37.4121	12.4116	470	15.0838	0.25	3.23	4.66947	50.76	100.48	29.7167	181.423	69.43	163.283
		0.3 mM + NPK	8.06	108.333	25.9083	33.7448	11.195	443.28	12.5928	0.233333	3.12	4.03758	36.75	79.9267	24.28	144.31	50.0367	129.88
		0.4 mM + NPK	6.24333	84	20.0681	26.1381	8.67141	388.036	11.9935	0.216667	3.05	3.93201	10.2967	37.43	12.9367	67.5833	9.57	60.8267
		0.5 mM + NPK	5.73333	76.6667	18.4306	24.0053	7.96385	368.135	9.58167	0.186667	2.91333	3.29849	7.33	22.1233	9.69	39.9467	-1.99667	35.95
		0.6 mM + NPK
	Standar Error		SE	SE	SE	SE	SE	SE	SE	SE	SE	SE	SE	SE	SE	SE	SE	SE
			0.1472	1.96267	0.478201	0.622842	0.20663	0.981336	0.436319	0.0483826	0.0187625	0.104188	1.94388	0.384035	0.372669	0.694032	3.04588	0.623129
			0.154373	1.96267	0.499828	0.651011	0.215975	5.22725	0.519937	0.0445567	0.0168296	0.13271	0.550491	3.63094	0.145326	6.55796	2.13766	5.90236
			0.164186	2.16031	0.524322	0.682913	0.226559	2.48976	0.219714	0.0385873	0.0158397	0.0465875	0.48789	1.14609	0.221834	2.06816	1.92797	1.86067
			0.166827	2.22784	0.536756	0.699108	0.231932	1.41426	0.237146	0.0144021	0.0154625	0.0546749	1.1981	2.12612	0.254624	3.83976	2.06013	3.45555
			0.179284	2.41913	0.571376	0.7442	0.246891	0.471418	0.174332	0.0374177	0.0152268	0.0319913	2.67062	0.918044	0.479049	1.65596	3.35445	1.49024
			0.159657	2.22784	0.515367	0.671249	0.222689	3.85582	0.2544	0.0178476	0.0147083	0.100409	4.19116	2.61608	1.5557	4.72671	6.92563	4.25226
			0.123051	1.69972	0.399194	0.519938	0.172491	3.61159	0.401561	0.0118638	0.0143783	0.127164	1.02488	3.42483	0.323062	6.18215	1.08202	5.56229
			0.11512	1.5154	0.366621	0.477512	0.158416	2.64916	0.190507	0.00544347	0.0667242	0.141726	0.353941	1.51126	0.302701	2.72811	1.16555	2.45598

## Sheet: Photosynthetic WUE
	1	Fruit yield (g plant-1)
	Treatment	R1	R2	R3	Mean	% increase
	Control	336.529	339.337	342.26	339.375	0
	NPK	408	411	412	410.333	20.9084
	0.05 mM + NPK	427.098	415.472	437.64	426.737	25.7419
	0.1 mM + NPK	452.928	452.753	461.987	455.889	34.3319
	0.2 mM + NPK	495	492	489	492	44.9722
	0.3 mM + NPK	469	471	470	470	38.4897
	0.4 mM + NPK	443.485	435	451.355	443.28	30.6164
	0.5 mM + NPK	388	395.715	380.393	388.036	14.3383
	0.6 mM + NPK	366.623	363.426	374.356	368.135	8.47427
	1	PDW ( g plant-1)
	Treatment	R1	R2	R3	Mean	% increase
	Control	48.114	44.3472	47.0363	46.4992	0
	NPK	62.3737	63.3313	62.7212	62.8088	35.0751
	0.05 mM + NPK	63.3737	62.3313	63.7212	63.1421	35.7919
	0.1 mM + NPK	63.6753	62.4348	65.0889	63.733	37.0627
	0.2 mM + NPK	68.3514	65.0103	65.7984	66.3867	42.7698
	0.3 mM + NPK	71.018	72.3969	72.5583	71.9911	54.8223
	0.4 mM + NPK	65	65.3002	54.8576	61.7193	32.732
	0.5 mM + NPK	53.8089	50.5803	54.885	53.0914	14.1771
	0.6 mM + NPK	49.4182	46.4531	50.4066	48.7593	4.86061
									Net assimilation rate (A)
	1	A (umol m-2s-1)							PWUE (umol mmol-1)
	Treatment	R1	R2	R3	Mean	% increase		Treatment	R1	R2	R3	Mean	% increase
	Control							Control	#DIV/0!	#DIV/0!	#DIV/0!	#DIV/0!	#DIV/0!
	NPK	12.78	11.8	10.93	11.8367	0		NPK	3.21106	2.93547	2.77397	2.9735	0
	0.05 mM + NPK	12.96	12.92	11.03	12.3033	3.94255		0.05 mM + NPK	3.63025	3.58322	3.12084	3.44477	15.8491
	0.1 mM + NPK	13.6545	14.025	13.099	13.5928	14.8367		0.1 mM + NPK	4.06384	4.13278	3.93789	4.04484	36.0295
	0.2 mM + NPK	14.125	14.255	13.326	13.902	17.4486		0.2 mM + NPK	4.3064	4.30301	4.10384	4.23775	42.5173
	0.3 mM + NPK	15.0582	15.4658	14.7275	15.0838	27.4331		0.3 mM + NPK	4.66199	4.74076	4.60565	4.66947	57.0361
	0.4 mM + NPK	12.6545	12.025	13.099	12.5928	6.38834		0.4 mM + NPK	4.05593	3.81601	4.24081	4.03758	35.7855
	0.5 mM + NPK	11.0542	12.716	12.2102	11.9935	1.32498		0.5 mM + NPK	3.62434	4.1279	4.0438	3.93201	32.2353
	0.6 mM + NPK	10.005	9.2	9.54	9.58167	-19.051		0.6 mM + NPK	3.63818	3.06667	3.19064	3.29849	10.9298
	2	Gs (mol m-2 s-1)
	Treatment	R1	R2	R3	Mean	% increase
	Control
	NPK	0.49	0.29	0.35	0.376667	0
	0.05 mM + NPK	0.43	0.25	0.29	0.323333	-14.1593
	0.1 mM + NPK	0.36	0.31	0.2	0.29	-23.0088
	0.2 mM + NPK	0.25	0.29	0.31	0.283333	-24.7788
	0.3 mM + NPK	0.34	0.22	0.19	0.25	-33.6283
	0.4 mM + NPK	0.25	0.26	0.19	0.233333	-38.0531
	0.5 mM + NPK	0.19	0.24	0.22	0.216667	-42.4779
	0.6 mM + NPK	0.2	0.18	0.18	0.186667	-50.4425
	3	E (mmol m-2 s-1)
	Treatment	R1	R2	R3	Mean	% increase
	Control
	NPK	3.98	4.0198	3.9402	3.98	0
	0.05 mM + NPK	3.57	3.6057	3.5343	3.57	-10.3015
	0.1 mM + NPK	3.36	3.3936	3.3264	3.36	-15.5779
	0.2 mM + NPK	3.28	3.3128	3.2472	3.28	-17.5879
	0.3 mM + NPK	3.23	3.2623	3.1977	3.23	-18.8442
	0.4 mM + NPK	3.12	3.1512	3.0888	3.12	-21.608
	0.5 mM + NPK	3.05	3.0805	3.0195	3.05	-23.3668
	0.6 mM + NPK	2.75	3	2.99	2.91333	-26.8007
					#DIV/0!
					#DIV/0!
					#DIV/0!
					#DIV/0!
					#DIV/0!
					#DIV/0!
					#DIV/0!
					#DIV/0!

## Sheet: Nutrient use efficiency 
1	N use efficiency																						increase over control						N appplied per pot (g per plant)					N	Agrnonic use efficiency (g g-1)								Physiological NUE (g g-1)
																Treatment	R1	R2	R3	Mean	% increase		Treatment	R1	R2	R3			Treatment	R1	R2	R3	R4		Treatment	R1	R2	R3	Mean	% increase			Treatment	R1	R2	R3	Mean	% increase
																control	336.529	339.337	342.26	339.375	0		control	0	0	0			control						control								control
																NPK	408	411	412	410.333	20.9084		NPK	71.4709	71.6627	69.7403			NPK	1.3	1.3	1.3			NPK	54.9776	55.1251	53.6464	54.583	0			NPK	174.692	143.892	173.63	164.072	0
																0.05 mM	427.098	415.472	437.64	426.737	25.7419		0.05 mM	90.5692	76.1351	95.3806			0.05 mM	1.3	1.3	1.3			0.05 mM	69.6687	58.5655	73.3697	67.2013	23.1175			0.05 mM	203.963	163.593	218.775	195.444	19.121
																0.1 mM	452.928	452.753	461.987	455.889	34.3319		0.1 mM	116.399	113.415	119.727			0.1 mM	1.3	1.3	1.3			0.1 mM	89.5379	87.2426	92.0979	89.6262	64.2015			0.1 mM	229.395	214.269	225.13	222.931	35.8746
																0.2 mM	495	492	489	492	44.9722		0.2 mM	158.471	152.663	146.74			0.2 mM	1.3	1.3	1.3			0.2 mM	121.901	117.433	112.877	117.404	115.092			0.2 mM	257.45	262.97	267.027	262.483	59.9806
																0.3 mM	469	471	470	470	38.4897		0.3 mM	132.471	131.663	127.74			0.3 mM	1.3	1.3	1.3			0.3 mM	101.901	101.279	98.2618	100.48	84.0873			0.3 mM	202.286	178.9	216.906	199.364	21.5105
																0.4 mM	443.485	435	451.355	443.28	30.6164		0.4 mM	106.956	95.6627	109.095			0.4 mM	1.3	1.3	1.3			0.4 mM	82.2736	73.5867	83.9191	79.9265	46.4309			0.4 mM	206.353	168.534	314.035	229.641	39.9637
																0.5 mM	388	395.715	380.393	388.036	14.3383		0.5 mM	51.4709	56.3778	38.1333			0.5 mM	1.3	1.3	1.3			0.5 mM	39.593	43.3675	29.3333	37.4313	-31.4232			0.5 mM	354.215	554.651	246.688	385.185	134.766
																0.6 mM	366.623	363.426	374.356	368.135	8.47427		0.6 mM	30.0942	24.0885	32.096			0.6 mM	1.3	1.3	1.3			0.6 mM	23.1494	18.5296	24.6893	22.1227	-59.4696			0.6 mM	350.662	254.015	304.726	303.134	84.7574
		Plant dry weight (shoot) (g /plant)						N in plant (%)															increase over control						N appplied per pot (g per plant)						Recovery Efficiency (%)
		Treatment	R1	R2	R3	Mean	% increase		Treatment	R1	R2	R3	Mean	% increase		Treatment	R1	R2	R3	Mean	% increase		Treatment	R1	R2	R3			Treatment	R1	R2	R3			Treatment	R1	R2	R3	Mean	% increase
		Control	48.114	46	47.0363	47.0501	0		control	1.465	1.45	1.48	1.465	0		control	0.70487	0.667	0.696137	0.689336	0		control	0	0	0			control						control
		NPK	62.3737	63.3313	62.7212	62.8088	33.4934		NPK	1.786	1.83958	1.75028	1.79195	22.3176		NPK	1.114	1.16503	1.0978	1.12561	63.2887		NPK	0.409125	0.49803	0.40166			NPK	1.3	1.3	1.3			NPK	31.4711	38.31	30.8969	33.5594	0
		0.05 mM + NPK	63.3737	62.3313	63.7212	63.1421	34.2018		0.05 mM	1.81292	1.81673	1.77667	1.80211	23.0107		0.05 mM	1.14892	1.13239	1.13211	1.13781	65.0586		0.05 mM	0.444048	0.465393	0.435976			0.05 mM	1.3	1.3	1.3			0.05 mM	34.1575	35.7994	33.5366	34.4979	2.79656
		0.1 mM + NPK	63.6753	62.4348	65.0889	63.733	35.4578		0.1 mM	1.90386	1.9161	1.88658	1.90218	29.8415		0.1 mM	1.21229	1.19631	1.22795	1.21218	75.8481		0.1 mM	0.507418	0.529312	0.531815			0.1 mM	1.3	1.3	1.3			0.1 mM	39.0321	40.7163	40.9088	40.2191	19.8447
		0.2 mM + NPK	68.3514	65.0103	65.7984	66.3867	41.098		0.2 mM	1.9318	1.91897	1.89316	1.91464	30.6924		0.2 mM	1.32041	1.24753	1.24567	1.2712	84.41		0.2 mM	0.61554	0.580532	0.549533			0.2 mM	1.3	1.3	1.3			0.2 mM	47.3492	44.6563	42.2717	44.7591	33.3729
		0.3 mM + NPK	69.018	70.3969	66.5583	68.6577	45.9247		0.3 mM	1.97012	1.99292	1.93072	1.96459	34.1017		0.3 mM	1.35974	1.40296	1.28506	1.34925	95.732		0.3 mM	0.654869	0.735956	0.588919			0.3 mM	1.3	1.3	1.3			0.3 mM	50.3746	56.612	45.3015	50.7627	51.2623
		0.4 mM + NPK	65	65.3002	54.8576	61.7193	31.1778		0.4 mM	1.88182	1.89068	1.90226	1.89159	29.1186		0.4 mM	1.22319	1.23462	1.04353	1.16711	69.3096		0.4 mM	0.518315	0.567616	0.347397			0.4 mM	1.3	1.3	1.3			0.4 mM	39.8704	43.6628	26.7228	36.752	9.51345
		0.5 mM + NPK	53.8089	50.5803	54.885	53.0914	12.8402		0.5 mM	1.58	1.51965	1.55	1.54988	5.79415		0.5 mM	0.85018	0.768646	0.850718	0.823181	19.4166		0.5 mM	0.14531	0.101646	0.154581			0.5 mM	1.3	1.3	1.3			0.5 mM	11.1777	7.81889	11.8908	10.2958	-69.3206
		0.6 mM + NPK	49.4182	46.4531	50.4066	48.7593	3.63272		0.6 mM	1.6	1.64	1.59	1.61	9.89761		0.6 mM	0.790691	0.761831	0.801465	0.784662	13.8288		0.6 mM	0.0858211	0.0948311	0.105327			0.6 mM	1.3	1.3	1.3			0.6 mM	6.60162	7.2947	8.10211	7.33281	-78.1497
2	P use efficiency																						increase over control						P appplied per pot (g per plant)						Agrnonic use efficiency (g g-1)							Physiological NUE (g g-1)
																Treatment	R1	R2	R3	Mean	% increase		Treatment	R1	R2	R3			Treatment	R1	R2	R3	R4		Treatment	R1	R2	R3	Mean	% increase		Treatment	R1	R2	R3	Mean	% increase
																control	336.529	339.337	342.26	339.375	0		control	0	0	0			control						control							control
																NPK	408	411	412	410.333	20.9084		NPK	71.4709	71.6627	69.7403			NPK	0.72	0.72	0.72			NPK	99.2652	99.5315	96.8616	98.5527	0		NPK	467.708	437.336	446.703	450.582	0
																0.05 mM	427.098	415.472	437.64	426.737	25.7419		0.05 mM	90.5692	76.1351	95.3806			0.05 mM	0.72	0.72	0.72			0.05 mM	125.791	105.743	132.473	121.336	23.1175		0.05 mM	568.088	465.227	586.509	539.941	19.8319
																0.1 mM	452.928	452.753	461.987	455.889	34.3319		0.1 mM	116.399	113.415	119.727			0.1 mM	0.72	0.72	0.72			0.1 mM	161.666	157.521	166.288	161.825	64.2015		0.1 mM	678.971	647.726	671.801	666.166	47.8456
																0.2 mM	495	492	489	492	44.9722		0.2 mM	158.471	152.663	146.74			0.2 mM	0.72	0.72	0.72			0.2 mM	220.098	212.031	203.806	211.979	115.092		0.2 mM	825.708	811.122	796.894	811.242	80.0429
																0.3 mM	469	471	470	470	38.4897		0.3 mM	132.471	131.663	127.74			0.3 mM	0.72	0.72	0.72			0.3 mM	183.987	182.865	177.417	181.423	84.0873		0.3 mM	640.454	594.482	598.169	611.035	35.6101
																0.4 mM	443.485	435	451.355	443.28	30.6164		0.4 mM	106.956	95.6627	109.095			0.4 mM	0.72	0.72	0.72			0.4 mM	148.55	132.865	151.521	144.312	46.4309		0.4 mM	583.334	495.325	737.357	605.339	34.3459
																0.5 mM	388	395.715	380.393	388.036	14.3383		0.5 mM	51.4709	56.3778	38.1333			0.5 mM	0.72	0.72	0.72			0.5 mM	71.4874	78.3025	52.9629	67.5843	-31.4232		0.5 mM	558.496	635.19	387.219	526.968	16.9527
																0.6 mM	366.623	363.426	374.356	368.135	8.47427		0.6 mM	30.0942	24.0885	32.096			0.6 mM	0.72	0.72	0.72			0.6 mM	41.7974	33.4563	44.5778	39.9439	-59.4696		0.6 mM	438.976	365.512	428.605	411.031	-8.7778
		Plant dry weight (shoot) (g /plant)						P in plant (%)															increase over control						N appplied per pot (g per plant)						Recovery Efficiency (%)
		Treatment	R1	R2	R3	Mean	% increase		Treatment	R1	R2	R3	Mean	% increase		Treatment	R1	R2	R3	Mean	% increase		Treatment	R1	R2	R3			Treatment	R1	R2	R3			Treatment	R1	R2	R3	Mean	% increase
		Control	48.114	44.3472	47.0363	46.4992	0		control	0.121091	0.128262	0.110301	0.119885	0		control	0.0582617	0.0568807	0.0518814	0.0556746	0		control	0	0	0			control						control
		NPK	62.3737	63.3313	62.7212	62.8088	35.0751		NPK	0.3384	0.348552	0.331632	0.339528	183.212		NPK	0.211073	0.220743	0.208004	0.213273	283.071		NPK	0.152811	0.163862	0.156122			NPK	0.72	0.72	0.72			NPK	21.2238	22.7586	21.6837	21.8887	0
		0.05 mM + NPK	63.3737	62.3313	63.7212	63.1421	35.7919		0.05 mM	0.343502	0.353807	0.336631	0.344647	187.482		0.05 mM	0.21769	0.220532	0.214506	0.217576	290.799		0.05 mM	0.159428	0.163652	0.162624			0.05 mM	0.72	0.72	0.72			0.05 mM	22.1428	22.7294	22.5867	22.4863	2.73031
		0.1 mM + NPK	63.6753	62.4348	65.0889	63.733	37.0627		0.1 mM	0.360731	0.371553	0.353516	0.361933	201.901		0.1 mM	0.229697	0.231978	0.2301	0.230592	314.177		0.1 mM	0.171435	0.175098	0.178218			0.1 mM	0.72	0.72	0.72			0.1 mM	23.8104	24.3191	24.7526	24.294	10.9891
		0.2 mM + NPK	68.3514	65.0103	65.7984	66.3867	42.7698		0.2 mM	0.366024	0.377005	0.358704	0.367245	206.332		0.2 mM	0.250183	0.245092	0.236022	0.243766	337.84		0.2 mM	0.191921	0.188212	0.18414			0.2 mM	0.72	0.72	0.72			0.2 mM	26.6557	26.1405	25.575	26.1238	19.3483
		0.3 mM + NPK	71.018	72.3969	72.5583	71.9911	54.8223		0.3 mM	0.373287	0.384485	0.365821	0.374531	212.409		0.3 mM	0.265101	0.278355	0.265434	0.26963	384.296		0.3 mM	0.206839	0.221475	0.213552			0.3 mM	0.72	0.72	0.72			0.3 mM	28.7276	30.7604	29.66	29.716	35.7598
		0.4 mM + NPK	65	65.3002	54.8576	61.7193	32.732		0.4 mM	0.371714	0.382865	0.36428	0.372953	211.093		0.4 mM	0.241614	0.250012	0.199835	0.230487	313.99		0.4 mM	0.183352	0.193131	0.147954			0.4 mM	0.72	0.72	0.72			0.4 mM	25.4656	26.8238	20.5491	24.2795	10.9227
		0.5 mM + NPK	53.8089	50.5803	54.885	53.0914	14.1771		0.5 mM	0.279548	0.287934	0.273957	0.28048	133.958		0.5 mM	0.150422	0.145638	0.150361	0.148807	167.28		0.5 mM	0.0921598	0.0887574	0.09848			0.5 mM	0.72	0.72	0.72			0.5 mM	12.8	12.3274	13.6778	12.9351	-40.9052
		0.6 mM + NPK	49.4182	46.4531	50.4066	48.7593	4.86061		0.6 mM	0.25662	0.264319	0.251488	0.257475	114.769		0.6 mM	0.126817	0.122784	0.126766	0.125456	125.338		0.6 mM	0.0685553	0.0659035	0.0748849			0.6 mM	0.72	0.72	0.72			0.6 mM	9.52157	9.15326	10.4007	9.69184	-55.7221
3	K use efficiency															Fruit fresh weight ( g / plant)							increase over control						P appplied per pot (g per plant)						Agrnonic use efficiency (g g-1)							Physiological NUE (g g-1)
																Treatment	R1	R2	R3	Mean	% increase		Treatment	R1	R2	R3			Treatment	R1	R2	R3	R4		Treatment	R1	R2	R3	Mean	% increase		Treatment	R1	R2	R3	Mean	% increase
																control	336.529	339.337	342.26	339.375	0		control	0	0	0			control						control							control
																NPK	408	411	412	410.333	20.9084		NPK	71.4709	71.6627	69.7403			NPK	0.8	0.8	0.8			NPK	89.3386	89.5783	87.1754	88.6975	0		NPK	240.072	183.035	227.153	216.754	0
																0.05 mM	427.098	415.472	437.64	426.737	25.7419		0.05 mM	90.5692	76.1351	95.3806			0.05 mM	0.8	0.8	0.8			0.05 mM	113.212	95.1689	119.226	109.202	23.1175		0.05 mM	279.593	194.873	286.609	253.692	17.0416
																0.1 mM	452.928	452.753	461.987	455.889	34.3319		0.1 mM	116.399	113.415	119.727			0.1 mM	0.8	0.8	0.8			0.1 mM	145.499	141.769	149.659	145.643	64.2015		0.1 mM	313.305	260.093	303.417	292.272	34.8405
																0.2 mM	495	492	489	492	44.9722		0.2 mM	158.471	152.663	146.74			0.2 mM	0.8	0.8	0.8			0.2 mM	198.089	190.828	183.425	190.781	115.092		0.2 mM	350.043	312.811	350.997	337.95	55.9146
																0.3 mM	469	471	470	470	38.4897		0.3 mM	132.471	131.663	127.74			0.3 mM	0.8	0.8	0.8			0.3 mM	165.589	164.578	159.675	163.281	84.0873		0.3 mM	258.811	212.403	238.927	236.714	9.20875
																0.4 mM	443.485	435	451.355	443.28	30.6164		0.4 mM	106.956	95.6627	109.095			0.4 mM	0.8	0.8	0.8			0.4 mM	133.695	119.578	136.369	129.881	46.4309		0.4 mM	255.413	188.486	397.223	280.374	29.3516
																0.5 mM	388	395.715	380.393	388.036	14.3383		0.5 mM	51.4709	56.3778	38.1333			0.5 mM	0.8	0.8	0.8			0.5 mM	64.3386	70.4722	47.6667	60.8258	-31.4232		0.5 mM	898.026	600.726	485.436	661.396	205.137
																0.6 mM	366.623	363.426	374.356	368.135	8.47427		0.6 mM	30.0942	24.0885	32.096			0.6 mM	0.8	0.8	0.8			0.6 mM	37.6177	30.1106	40.1201	35.9495	-59.4696		0.6 mM	-830.405	7369.72	-2144.93	1464.79	575.788
		Plant dry weight (shoot) (g /plant)							K in plant (%)							uptake (g plant-1)							increase over control						N appplied per pot (g per plant)						Recovery Efficiency (%)
		Treatment	R1	R2	R3	Mean	% increase		Treatment	R1	R2	R3	Mean	% increase		Treatment	R1	R2	R3	Mean	% increase		Treatment	R1	R2	R3			Treatment	R1	R2	R3			Treatment	R1	R2	R3	Mean	% increase
		Control	48.114	44.3472	47.0363	46.4992	0		control	1.12	1.09	1.1	1.10333	0		control	0.538877	0.483384	0.517399	0.51322	0		control	0	0	0			control						control
		NPK	62.3737	63.3313	62.7212	62.8088	35.0751		NPK	1.34124	1.38148	1.31442	1.34571	21.9679		NPK	0.836582	0.874909	0.824418	0.845303	64.7058		NPK	0.297706	0.391524	0.307019			NPK	0.8	0.8	0.8			NPK	37.2132	48.9406	38.3774	41.5104	0
		0.05 mM + NPK	63.3737	62.3313	63.7212	63.1421	35.7919		0.05 mM	1.36146	1.4023	1.33423	1.366	23.8066		0.05 mM	0.862809	0.874075	0.850189	0.862358	68.0288		0.05 mM	0.323932	0.390691	0.33279			0.05 mM	0.8	0.8	0.8			0.05 mM	40.4915	48.8364	41.5987	43.6422	5.13563
		0.1 mM + NPK	63.6753	62.4348	65.0889	63.733	37.0627		0.1 mM	1.42975	1.47264	1.40115	1.43452	30.0165		0.1 mM	0.910398	0.919442	0.911996	0.913945	78.0805		0.1 mM	0.371521	0.436057	0.394596			0.1 mM	0.8	0.8	0.8			0.1 mM	46.4401	54.5072	49.3245	50.0906	20.6701
		0.2 mM + NPK	68.3514	65.0103	65.7984	66.3867	42.7698		0.2 mM	1.45073	1.49425	1.42172	1.45557	31.9244		0.2 mM	0.991595	0.971418	0.935467	0.96616	88.2545		0.2 mM	0.452718	0.488034	0.418068			0.2 mM	0.8	0.8	0.8			0.2 mM	56.5897	61.0043	52.2585	56.6175	36.3936
		0.3 mM + NPK	71.018	72.3969	72.5583	71.9911	54.8223		0.3 mM	1.47951	1.5239	1.44992	1.48445	34.5419		0.3 mM	1.05072	1.10326	1.05204	1.06867	108.229		0.3 mM	0.511844	0.619872	0.534641			0.3 mM	0.8	0.8	0.8			0.3 mM	63.9805	77.4839	66.8301	69.4315	67.2631
		0.4 mM + NPK	65	65.3002	54.8576	61.7193	32.732		0.4 mM	1.47328	1.51748	1.44382	1.47819	33.9751		0.4 mM	0.957632	0.990916	0.792043	0.913531	77.9998		0.4 mM	0.418756	0.507532	0.274644			0.4 mM	0.8	0.8	0.8			0.4 mM	52.3444	63.4415	34.3304	50.0388	20.5453
		0.5 mM + NPK	53.8089	50.5803	54.885	53.0914	14.1771		0.5 mM	1.10798	1.14122	1.08582	1.11168	0.756066		0.5 mM	0.596193	0.577234	0.595954	0.589793	14.9202		0.5 mM	0.0573156	0.0938494	0.0785548			0.5 mM	0.8	0.8	0.8			0.5 mM	7.16445	11.7312	9.81935	9.57166	-76.9415
		0.6 mM + NPK	49.4182	46.4531	50.4066	48.7593	4.86061		0.6 mM	1.01711	1.04762	0.996766	1.0205	-7.5077		0.6 mM	0.502637	0.486653	0.502436	0.497242	-3.11338		0.6 mM	-0.0362403	0.00326858	-0.0149637			0.6 mM	0.8	0.8	0.8			0.6 mM	-4.53004	0.408572	-1.87046	-1.99731	-104.812
					#DIV/0!
					#DIV/0!
					#DIV/0!
					#DIV/0!
					#DIV/0!
					#DIV/0!
					#DIV/0!											Physiological NUE (g yield per g N)
					#DIV/0!											Treatment	R1	R2	R3	R4	%	se
																Control	#DIV/0!	#DIV/0!	#DIV/0!			#DIV/0!
																NPK	174.692	143.892	173.63		164.072	8.74197
																100 NPK	203.963	163.593	218.775		195.444	14.2801
																200 NPK	229.395	214.269	225.13		222.931	3.89946
																300 NPK	257.45	262.97	267.027		262.483	2.40356
																0.1 NPK	202.286	178.9	216.906		199.364	9.58543
																0.3 NPK	206.353	168.534	314.035		229.641	37.7471
																0.5 NPK	354.215	554.651	246.688		385.185	78.1498
																100 + 0.1 + NPK	350.662	254.015	304.726		303.134	24.1715

## Sheet: Graph pot trial
	Fruit yield		PWUE**	1
0	410.333		2.9735	2
0.05	426.737		3.44477	3
0.1	455.889		4.04484	0.841265
0.2	492		4.23775	5
0.3	470		4.66947	6
0.4	443.28		4.03758	7
0.5	388.036		3.93201	8
0.6	368.135		3.29849	9
				10
	se		se	11
	0.981336		0.104188	12
	5.22725		0.13271	13
	2.48976		0.0465875	14
	1.41426		0.0546749	15
	0.471418		0.0319913	16
	3.85582		0.100409	17
	3.61159		0.127164	18
	2.64916		0.141726
	Leaf area index	Dry biomass		1										0.179 B	0.188 B	0.201 A	0.201 A	0.199 A	0.178 B	0.158 C	0.150 C
0	0.179	75.15		2
0.05	0.188	78.92		3
0.1	0.201	86.11		4
0.2	0.202	90.11		5
0.3	0.199	83.63		6
0.4	0.178	81.14		7
0.5	0.158	70.89		8
0.6	0.15	67.42		9
				10
				11
				12
				13
				14
				15
				16
				17
				18
	Lipid peroxidation (LP) level	Superoxide Dismutase (SOD) activity		1
0	0.564	7.58		2										7.21 DE	7.58 CD	8.31 AB	8.67 A	7.98 BC	7.87 C	6.79 E	6.22 F
0.05	0.32148	7.98		3
0.1	0.2538	8.31		4
0.2	0.2397	8.67		5
0.3	0.337977	7.87		6
0.4	0.408952	7.21		7
0.5	0.453937	6.8		8
0.6	0.490706	6.22		9
				10
				11
				12
				13
				14
				15
				16
				17
				18
	Leaf P contents	Leaf N contents	leaf K contents	1
0	0.24404	0.723969	0.922752	2
0.05	0.248085	0.734972	0.938911	3
0.1	0.260342	0.769871	0.986287	4
0.2	0.266212	0.785502	1.00915	5
0.3	0.267885	0.790856	1.01536	6
0.4	0.263756	0.779472	0.999461	7
0.5	0.222605	0.66327	0.84635	8
0.6	0.21003	0.627147	0.799204	9
				10
				11
				12
				13
				14
				15
				16
				17
				18

## Sheet: Data for Lab Trial 
Sr. No.	Parameters	incubation hours
1	Seed germination	120 hr	Treatment	R1	R2	R3	R4	Mean	%	se
			0 mM SA	0	0	33.3	0	8.325	0	8.325
			0.05 mM SA	0	0	33.3	0	8.325	0	8.325
			0.1 mM SA	33.3	0	0	0	8.325	0	8.325
			0.2 mM SA	0	33.3	33.3	0	16.65	100	9.61288
			0.3 mM SA	33.3	0	0	0	8.325	0	8.325
			0.4 mM SA	0	33.3	0	0	8.325	0	8.325
			0.5 mM SA	33.3	0	0	0	8.325	0	8.325
			0.6 mM SA	0	0	0	0	0	-100	0
		144 h
			Treatment	R1	R2	R3	R4	Mean	%	se
			0 mM SA	0	33.3	33.3	0	16.65	0	9.61288
			0.05 mM SA	0	33.3	33.3	11	19.4	16.5165	8.33337
			0.1 mM SA	33.3	0	33.3	13.5	20.025	20.2703	8.14467
			0.2 mM SA	0	33.3	33.3	33.3	24.975	50	8.325
			0.3 mM SA	33.3	0	33.3	33.3	24.975	50	8.325
			0.4 mM SA	0	33.3	0	33.3	16.65	-33.3333	9.61288
			0.5 mM SA	33.3	0	33.3	33.3	24.975	0	8.325
			0.6 mM SA	0	0	0	33.3	8.325	-66.6667	8.325
		168 h
			Treatment	R1	R2	R3	R4	Mean	%	se
			0 mM SA	0	33.3	33.3	33.3	24.975	0	8.325
			0.05 mM SA	5	33.3	33.3	33.3	26.225	5.00501	7.075
			0.1 mM SA	33.3	6	33.3	33.3	26.475	6.00601	6.825
			0.2 mM SA	33.3	33.3	66.7	33.3	41.65	66.7668	8.35
			0.3 mM SA	33.3	33.3	33.3	33.3	33.3	33.3333	0
			0.4 mM SA	0	33.3	0	33.3	16.65	-50	9.61288
			0.5 mM SA	33.3	0	33.3	33.3	24.975	-25	8.325
			0.6 mM SA	0	0	0	33.3	8.325	-75	8.325
		192 h
			Treatment	R1	R2	R3	R4	Mean	%	se
			0 mM SA	20	33.3	33.3	33.3	29.975	0	3.325
			0.05 mM SA	33.3	33.3	33.3	33.3	33.3	11.0926	0
			0.1 mM SA	35.3	33.3	33.3	33.3	33.8	12.7606	0.5
			0.2 mM SA	33.3	66.7	66.7	33.3	50	66.8057	9.64175
			0.3 mM SA	33.3	33.3	33.3	33.3	33.3	11.0926	0
			0.4 mM SA	33.3	33.3	0	33.3	24.975	-25	8.325
			0.5 mM SA	33.3	0	33.3	33.3	24.975	-25	8.325
			0.6 mM SA	0	33.3	0	33.3	16.65	-50	9.61288
		216 h
			Treatment	R1	R2	R3	R4	Mean	%	se
			0 mM SA	60.7	33.3	33.3	33.3	40.15	0	6.85
			0.05 mM SA	66.7	33.3	33.3	33.3	41.65	3.73599	8.35
			0.1 mM SA	66.7	42.3	33.3	33.3	43.9	9.33998	7.8905
			0.2 mM SA	66.7	66.7	66.7	66.7	66.7	66.127	0
			0.3 mM SA	66.7	33.3	33.3	33.3	41.65	3.73599	8.35
			0.4 mM SA	33.3	33.3	33.3	33.3	33.3	-20.048	0
			0.5 mM SA	33.3	33.3	33.3	33.3	33.3	-20.048	0
			0.6 mM SA	0	33.3	33.3	33.3	24.975	-40.036	8.325
		288 h
			Treatment	R1	R2	R3	R4	Mean	%	se
			0 mM SA	66.7	100	66.7	33.3	66.675	0	13.6151
			0.05 mM SA	66.7	100	66.7	33.3	66.675	0	13.6151
			0.1 mM SA	66.7	100	66.7	33.3	66.675	0	13.6151
			0.2 mM SA	100	100	100	100	100	49.9813	0
			0.3 mM SA	66.7	100	66.7	100	83.35	25.0094	9.61288
			0.4 mM SA	33.3	100	66.7	100	75	-10.018	15.9629
			0.5 mM SA	66.7	100	66.7	66.7	75.025	-9.988	8.325
			0.6 mM SA	33.3	66.7	66.7	66.7	58.35	-29.994	8.35
		312 h
			Treatment	R1	R2	R3	R4	Mean	%	se
			0 mM SA	66.7	100	66.7	66.7	75.025	0	8.325
			0.05 mM SA	100	100	66.7	66.7	83.35	11.0963	9.61288
			0.1 mM SA	100	100	66.7	100	91.675	22.1926	8.325
			0.2 mM SA	100	100	100	100	100	33.2889	0
			0.3 mM SA	100	100	100	100	100	33.2889	0
			0.4 mM SA	66.7	100	100	100	91.675	-8.325	8.325
			0.5 mM SA	100	100	100	66.7	91.675	-8.325	8.325
			0.6 mM SA	44	66.7	66.7	66.7	61.025	-38.975	5.675
		360 h
			Treatment	R1	R2	R3	R4	Mean	%	se
			0 mM SA	100	100	100	100	100	0	0
			0.05 mM SA	100	100	100	100	100	0	0
			0.1 mM SA	100	100	100	100	100	0	0
			0.2 mM SA	100	100	100	100	100	0	0
			0.3 mM SA	100	100	100	100	100	0	0
			0.4 mM SA	100	100	100	100	100	0	0
			0.5 mM SA	100	100	100	100	100	0	0
			0.6 mM SA	66.7	100	100	66.7	83.35	-16.65	9.61288
		456 h
			Treatment	R1	R2	R3	R4	Mean	%	se
			0 mM SA	100	100	100	100	100	0	0
			0.05 mM SA	100	100	100	100	100	0	0
			0.1 mM SA	100	100	100	100	100	0	0
			0.2 mM SA	100	100	100	100	100	0	0
			0.3 mM SA	100	100	100	100	100	0	0
			0.4 mM SA	100	100	100	100	100	0	0
			0.5 mM SA	100	100	100	100	100	0	0
			0.6 mM SA	100	100	100	66.6667	91.6667	-8.33333	8.33333
		480 h
			Treatment	R1	R2	R3	R4	Mean	%	se
			0 mM SA	100	100	100	100	100	0	0
			0.05 mM SA	100	100	100	100	100	0	0
			0.1 mM SA	100	100	100	100	100	0	0
			0.2 mM SA	100	100	100	100	100	0	0
			0.3 mM SA	100	100	100	100	100	0	0
			0.4 mM SA	100	100	100	100	100	0	0
			0.5 mM SA	100	100	100	100	100	0	0
			0.6 mM SA	100	100	100	100	100	0	0
		504 h
			Treatment	R1	R2	R3	R4	Mean	%	se
			0 mM SA	100	100	100	100	100	0	0
			0.05 mM SA	100	100	100	100	100	0	0
			0.1 mM SA	100	100	100	100	100	0	0
			0.2 mM SA	100	100	100	100	100	0	0
			0.3 mM SA	100	100	100	100	100	0	0
			0.4 mM SA	100	100	100	100	100	0	0
			0.5 mM SA	100	100	100	100	100	0	0
			0.6 mM SA	100	100	100	100	100	0	0
		528 h
			Treatment	R1	R2	R3	R4	Mean	%	se
			0 mM SA	100	100	100	100	100	0	0
			0.05 mM SA	100	100	100	100	100	0	0
			0.1 mM SA	100	100	100	100	100	0	0
			0.2 mM SA	100	100	100	100	100	0	0
			0.3 mM SA	100	100	100	100	100	0	0
			0.4 mM SA	100	100	100	100	100	0	0
			0.5 mM SA	100	100	100	100	100	0	0
			0.6 mM SA	100	100	100	100	100	0	0
	Root length (cm)	after 528 hr
			Treatment	R1	R2	R3	R4	Mean	%	se
			0 mM SA	1.78	1.45	1.23	1.65	1.5275	0	0.120165		1.53± 0.12b
			0.05 mM SA	1.63	1.5805	1.43	1.51	1.53762	0.662848	0.0435102		1.54 ±0.04b
			0.1 mM SA	1.76	1.77016	1.4872	1.45	1.61684	5.84877	0.0859476		1.62 ±0.09ab
			0.2 mM SA	1.7248	1.84	1.67	1.566	1.7002	11.3061	0.0570606		1.70 ±0.06ab
			0.3 mM SA	1.7593	1.9136	1.5364	1.77	1.74482	14.2274	0.0778723		1.74 ±0.08ab
			0.4 mM SA	1.91587	1.99014	1.58864	1.91549	1.85254	6.1733	0.0897003		1.83±0.09a
			0.5 mM SA	1.23	1.21	0.98	1.57	1.2475	-28.5028	0.121544		1.25 ±0.12c
			0.6 mM SA	0.98	1.12	1.22	1.09	1.1025	-36.8131	0.0493921		1.10 ±0.05c
	Shoot length (cm)	after 528 hr
			Treatment	R1	R2	R3	R4	Mean	%	se
			0 mM SA	1.35	0.98	1.2	1.5	1.2575	0	0.110934		1.26±0.11ab
			0.05 mM SA	1.12	1.0682	1.43	1.51	1.28205	1.95229	0.110243		1.28±0.11ab
			0.1 mM SA	1.56	1.19638	1.44	1.09	1.3216	5.0971	0.108078		1.32±0.11ab
			0.2 mM SA	1.5132	1.14	1.67	1.1772	1.3751	9.35189	0.129252		1.38±0.13ab
			0.3 mM SA	1.54346	1.1856	1.5364	1.77	1.50887	19.9893	0.12064		1.5 ±0.12a
			0.4 mM SA	1.60366	1.23302	1.55791	1.80894	1.55088	2.78469	0.119186		1.55± 0.12a
			0.5 mM SA	1.32	1.04	1.02	1.57	1.2375	-17.9848	0.13028		1.24 ±0.13ab
			0.6 mM SA	1.11	1.12	1.22	1.09	1.135	-24.7779	0.0290115		1.14 ±0.03b
	Biomass (mg plate-1)	after 528 hr
			Treatment	R1	R2	R3	R4	Mean	%	se
			0 mM SA	49.55	41.9667	46	41.3333	44.7125	0	1.91523		44.7±1.9 c
			0.05 mM SA	50.41	45.74	49.35	42.45	46.9875	5.08806	1.81292		47.0±1.81 bc
			0.1 mM SA	55.1	52.9	53.262	49.142	52.601	17.6427	1.24953		52.6±1.2 b
			0.2 mM SA	57.5	51.5	54.478	51.234	53.678	20.0514	1.47096		53.7±1.5 b
			0.3 mM SA	52.493	51.6933	54.3911	48.9867	51.891	16.0549	1.12128		51.9±1.1 bc
			0.4 mM SA	77.72	64.7667	73.0568	62.6941	69.5594	34.049	3.52289		69.6±1.0 a
			0.5 mM SA	50.541	50.6417	52.26	52.5133	51.489	-0.774749	0.521247		51.5±0.52 bc
			0.6 mM SA	54	45	50.77	43.55	48.33	-6.86251	2.45017		48.3±2.5 bc
	Total soluble sugars	after 312 hr
	(mg g-1 FW)		Treatment	R1	R2	R3	R4	Mean	%	se
			0 mM SA	14.022	12.487	14.6788		13.7293	0	0.562436		13.7 ± 0.56bc
			0.05 mM SA	14.5829	12.9864	15.266		14.2784	4	0.584933		14.3 ± 0.58ab
			0.1 mM SA	15.4382	13.7481	16.1614		15.1159	10.1	0.619242		15.1 ± 0.62a
			0.2 mM SA	14.5829	12.9864	15.266		14.2784	4	0.584933		14.3 ± 0.58ab
			0.3 mM SA	15.284	13.6108	15.9999		14.9649	9	0.613055		15.0 ±0.61ab
			0.4 mM SA	13.1807	11.7377	13.7981		12.9055	-13.7615	0.528689		12.9 ± 0.53cd
			0.5 mM SA	12.3394	10.9885	12.9174		12.0817	-19.2661	0.494943		12.1 ±0.49de
			0.6 mM SA	11.7785	10.489	12.3302		11.5326	-22.9358	0.472446		11.5 ±0.47e
	SOD	after 312 hr
	(activity h-1 100 mg-1)		Treatment	R1	R2	R3	R4	Mean	%	se
			0 mM SA	4.7348	4.21646	4.95659		4.63595	0	0.189917		4.64± 0.19cd
			0.05 mM SA	4.92419	4.38512	5.15485		4.82139	4	0.197514		4.82± 0.20b-d
			0.1 mM SA	5.11358	4.55378	5.35312		5.00683	8	0.205111		5.01±0.21a-c
			0.2 mM SA	5.30298	4.72244	5.55138		5.19226	12	0.212707		5.19± 0.21ab
			0.3 mM SA	5.49237	4.8911	5.74964		5.3777	16	0.220304		5.38± 0.22a
			0.4 mM SA	4.97154	4.42729	5.20442		4.86775	-9.48276	0.199413		4.87± 0.20b-d
			0.5 mM SA	4.54541	4.04781	4.75832		4.45051	-17.2414	0.182321		4.45±0.18de
			0.6 mM SA	4.21397	3.75265	4.41136		4.126	-23.2759	0.169026		4.13 ± 0.17e
	Leaf SA contents	after 312 hr
	(mg g-1)		Treatment	R1	R2	R3	R4	Mean	%	se
			0 mM SA	2.8	2.7692	2.80708		2.79209	0	0.0116274		2.79±0.012a
			0.05 mM SA	2.78	2.75151	2.79006		2.77386	-0.653115	0.0115461		2.77±0.012ab
			0.1 mM SA	2.7522	2.74151	2.77901		2.75757	-1.23638	0.0111533		2.76±0.011a-c
			0.2 mM SA	2.72468	2.71409	2.75122		2.73	-2.22402	0.0110418		2.73±0.011b-d
			0.3 mM SA	2.69743	2.68695	2.7237		2.7027	-3.20178	0.0109314		2.71±0.011c-e
			0.4 mM SA	2.67046	2.66008	2.69647		2.67567	-1	0.0108221		2.67±0.011de
			0.5 mM SA	2.64375	2.63348	2.6695		2.64891	-1.99	0.0107138		2.65±0.011e
			0.6 mM SA	2.51156	2.50181	2.65023		2.55453	-5.482	0.0479321		2.55±0.048f
	Leaf SA contents	after 528 hr
	(mg g-1)		Treatment	R1	R2	R3	R4	Mean	%	se
			0 mM SA	0.110506	0.121051	0.122105		0.117887	0	0.00370325
			0.05 mM SA	0.134	0.1354	0.14354		0.137647	16.7613	0.00297434
			0.1 mM SA	0.158024	0.156802	0.16568		0.160169	35.8661	0.0027783
			0.2 mM SA	0.185455	0.187545	0.168755		0.180585	53.1844	0.00594604
			0.3 mM SA	0.186755	0.184676	0.178468		0.183299	55.4871	0.00248947
			0.4 mM SA	0.201298	0.221298	0.212977		0.211858	15.5801	0.00580075
			0.5 mM SA	0.212172	0.201217	0.211217		0.208202	13.5857	0.00350335
			0.6 mM SA	0.228802	0.22188	0.23188		0.227521	24.1252	0.00295705
	Ethylene evolution	after 312 hr
	(mg g-1)		Treatment	R1	R2	R3	R4	Mean	%	se
			0 mM SA	3.197	3.1797	3.2		3.19223	0	0.00632641		3.19±0.01
			0.05 mM SA	3.1195	3.1295	3.105		3.118	-2.32544	0.0071124		3.12±0.01
			0.1 mM SA	2.9155	2.92155	2.82155		2.8862	-9.58681	0.0323731		2.89±0.03
			0.2 mM SA	2.72684	2.74268	2.62684		2.69879	-15.4577	0.0362652		2.70±0.03
			0.3 mM SA	2.71864	2.72186	2.57219		2.6709	-16.3314	0.0493659		2.67±0.04
			0.4 mM SA	2.62967	2.63297	2.5633		2.60864	-2.33082	0.0226944		2.61±0.02
			0.5 mM SA	2.46277	2.45628	2.55628		2.49178	-6.70645	0.0323062		2.49±0.03
			0.6 mM SA	2.181	2.21	2.31		2.23367	-16.3702	0.0390752		2.23±0.03
	Chlorophyll a & b	after 312 hr
	(µg g-1)		Treatment	R1	R2	R3	R4	Mean	%	se
			0 mM SA	90.5	124.2	63.616	80.41	89.6815	0	12.7723		89±2.1ab
			0.05 mM SA	92.31	130.41	63.9404	85.2346	92.9738	3.67106	13.8586		93± 2.2ab
			0.1 mM SA	96.0024	133.018	64.0683	86.0869	94.794	5.70069	14.3829		95±2.3ab
			0.2 mM SA	94.0824	142.329	65.0293	92.9739	98.6038	9.94884	16.0502		99±2.2ab
			0.3 mM SA	105.372	146.457	60.4123	93.9036	101.536	13.2188	17.753		102±2.3a
			0.4 mM SA	118.017	150.704	64.7619	105.172	109.664	8.00454	17.7727		110±2.0a
			0.5 mM SA	51.05	74.04	42.016	65.489	58.1487	-42.7311	7.17094		58±1.8bc
			0.6 mM SA	21.05	54.66	25.536	39.861	35.2767	-65.257	7.60487		35±1.7c

## Sheet: Graphs Lab trials (2)
Figure -1	Germination Percentage (%)	Rate of SA	120	144	168	192	216
		0 mM SA	8.33333	16.6667	25	30	40
		0.05 mM SA	9	19	26	33	42
		0.1 mM SA	10	20	27	34	44
		0.2 mM SA	16.6667	25	41.6667	50	66.6667
		0.3 mM SA	8.33333	25	33.3333	33.3333	41.6667
		0.4 mM SA	8.33333	16.6667	16.6667	25	33.3333
		0.5 mM SA	8.33333	25	25	25	33.3333
		0.6 mM SA	0	8.33333	8.33333	16.6667	25
		SE
		Rate of SA	120 h	144 h	168h	192h	216h
		0 m	1.5	0.601407	0.520833	1	0.520833
		0.05 m	1.2	1.25	1.04167	1.25	1.2
		0.1 m	1.12	1.20281	1.6	1.7	1.2
		0.2 m	1.20281	1.04167	1.04167	1.20281	1.4
		0.3 m	2	1.5	1.7	1.9	1.8
		0.4 m	1.1	1.20281	1.8	1.04167	2.1
		0.5 m	1.3	1.6	1.18	1.2	1.8
		0.6 m	1.5	1.11	1.09	1.20281	1.3
	Rate of SA	Ethylene evolved	SA contents
Figure 2	0 m	0.11	2.8
	0.05 m	0.143	2.78
	0.1 m	0.1573	2.7522
	0.2 m	0.1837	2.72468
	0.3 m	0.1859	2.69743
	0.4 m	0.2112	2.67046
	0.5 m	0.2178	2.64375
	0.6 m	0.26136	2.51156
	0 m	0.1	2.7692
	0.05 m	0.13	2.75151
	0.1 m	0.143	2.74151
	0.2 m	0.19837	2.71409
	0.3 m	0.21859	2.68695
	0.4 m	0.222112	2.66008
	0.5 m	0.27	2.63348
	0.6 m	0.2835	2.50181
	0 m	0.11245	2.80708
	0.05 m	0.128	2.79006
	0.1 m	0.1583	2.77901
	0.2 m	0.189837	2.75122
	0.3 m	0.219886	2.7237
	0.4 m	0.235311	2.69647
	0.5 m	0.23678	2.6695
	0.6 m	0.250863	2.65023
Figure 3	Rate of SA	SA contents (528 hr)	Electrolyte leakage
	0 m	0.110506	40.3604
	0.05 m	0.134	39.9063
	0.1 m	0.158024	38.721
	0.2 m	0.185455	35.1887
	0.3 m	0.186755	25.9393
	0.4 m	0.201298	22.4015
	0.5 m	0.212172	21.3219
	0.6 m	0.228802	22.8155
	0 m	0.121051	43.3604
	0.05 m	0.1354	35.9063
	0.1 m	0.156802	38.721
	0.2 m	0.187545	33.1887
	0.3 m	0.184676	26.9393
	0.4 m	0.221298	22.4015
	0.5 m	0.201217	19.3219
	0.6 m	0.22188	15.8155
	0 m	0.122105	40.3604
	0.05 m	0.14354	32.9063
	0.1 m	0.16568	35.721
	0.2 m	0.168755	34.1887
	0.3 m	0.178468	29.9393
	0.4 m	0.212977	25.4015
	0.5 m	0.211217	20.3219
	0.6 m	0.23188	13.8155
		Ethylene evolution	Electrolyte leakage
		3.197	40.3604
		3.1195	39.9063
		2.9155	38.721
		2.72684	35.1887
		2.71864	25.9393
		2.62967	22.4015
		2.46277	21.3219
		2.181	22.8155
		3.1797	43.3604
		3.1295	35.9063
		2.92155	38.721
		2.74268	33.1887
		2.72186	26.9393
		2.63297	22.4015
		2.45628	19.3219
		2.21	15.8155
		3.2	40.3604
		3.105	32.9063
		2.82155	35.721
		2.62684	34.1887
		2.57219	29.9393
		2.5633	25.4015
		2.55628	20.3219
		2.31	13.8155
